# Supplementary material for: Mapping Genetic Variants Underlying Differences in the Central Nitrogen Metabolism in Fermenter Yeasts
Source: PubMed Central journal article supplement (PMC3897725; doi:10.1371/journal.pone.0086533), 2014-01-21
Supplement: pone.0086533.s002.pdf [file pone.0086533.s002.pdf]

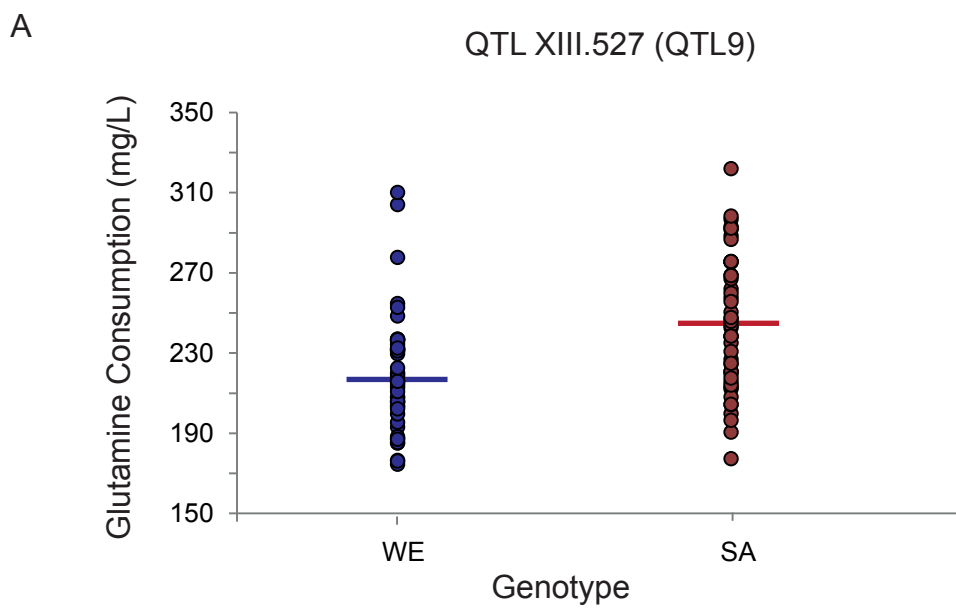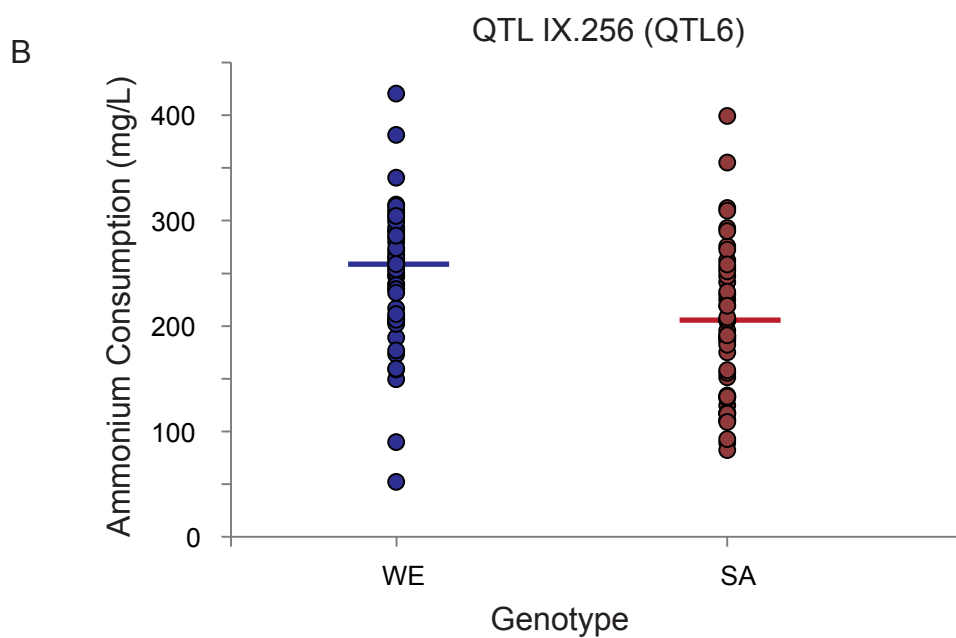

Figure S2
